# Supplementary material for: Vibrational spectroscopy of dispersed ReVIIOx sites supported on monoclinic zirconia
Source: Royal Society of Chemistry journal article supplement (doi:10.1039/d3dt04270g), 2024-01-01
Supplement: d3dt04270g1.pdf [file d3dt04270g1.pdf]

# Vibrational Spectroscopy of Dispersed $\text{Re}^{\text{VII}}\text{O}_x$ Sites Supported on Monoclinic Zirconia.

## SUPPLEMENTARY INFORMATION

Chrysanthi Andriopoulou,<sup>1</sup> Theocharis Kentri<sup>1</sup> and Soghomon Boghosian\*<sup>1,2,3</sup>

<sup>1</sup> *Department of Chemical Engineering, University of Patras, Patras, Greece*

<sup>2</sup> *Institute of Chemical Engineering Sciences, FORTH/ICE-HT, Patras, Greece*

<sup>3</sup> *School of Science and Technology, Hellenic Open University, GR-26335 Patras, Greece*

(\*) to whom correspondence should be addressed

e-mail: [bogosian@chemeng.upatras.gr](mailto:bogosian@chemeng.upatras.gr)

---

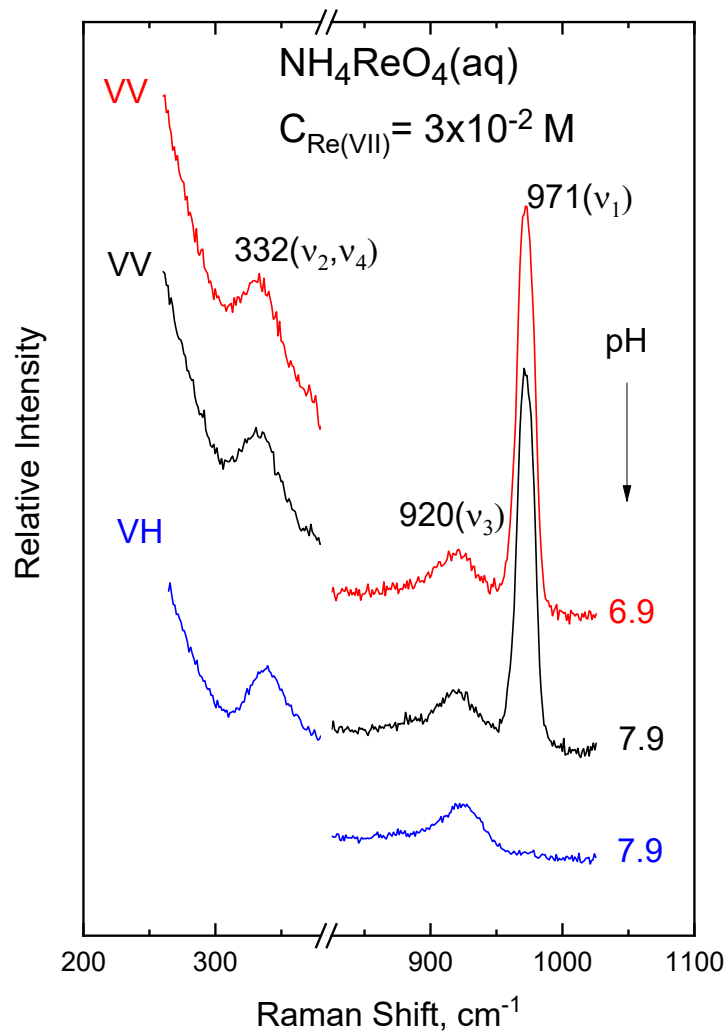

**Figure S1.** Raman spectra of  $\text{NH}_4\text{ReO}_4(\text{aq})$  solutions with  $C_{\text{Re(VII)}} = 3 \times 10^{-2} \text{ M}$  with pH of 6.9 and 7.9. The VV polarization configurations are shown for both solutions. The HV polarization configuration is also shown for the solution with pH=7.9. Laser wavelength,  $\lambda_0 = 532.0 \text{ nm}$ ; laser power, 50 mW; resolution,  $2 \text{ cm}^{-1}$ .

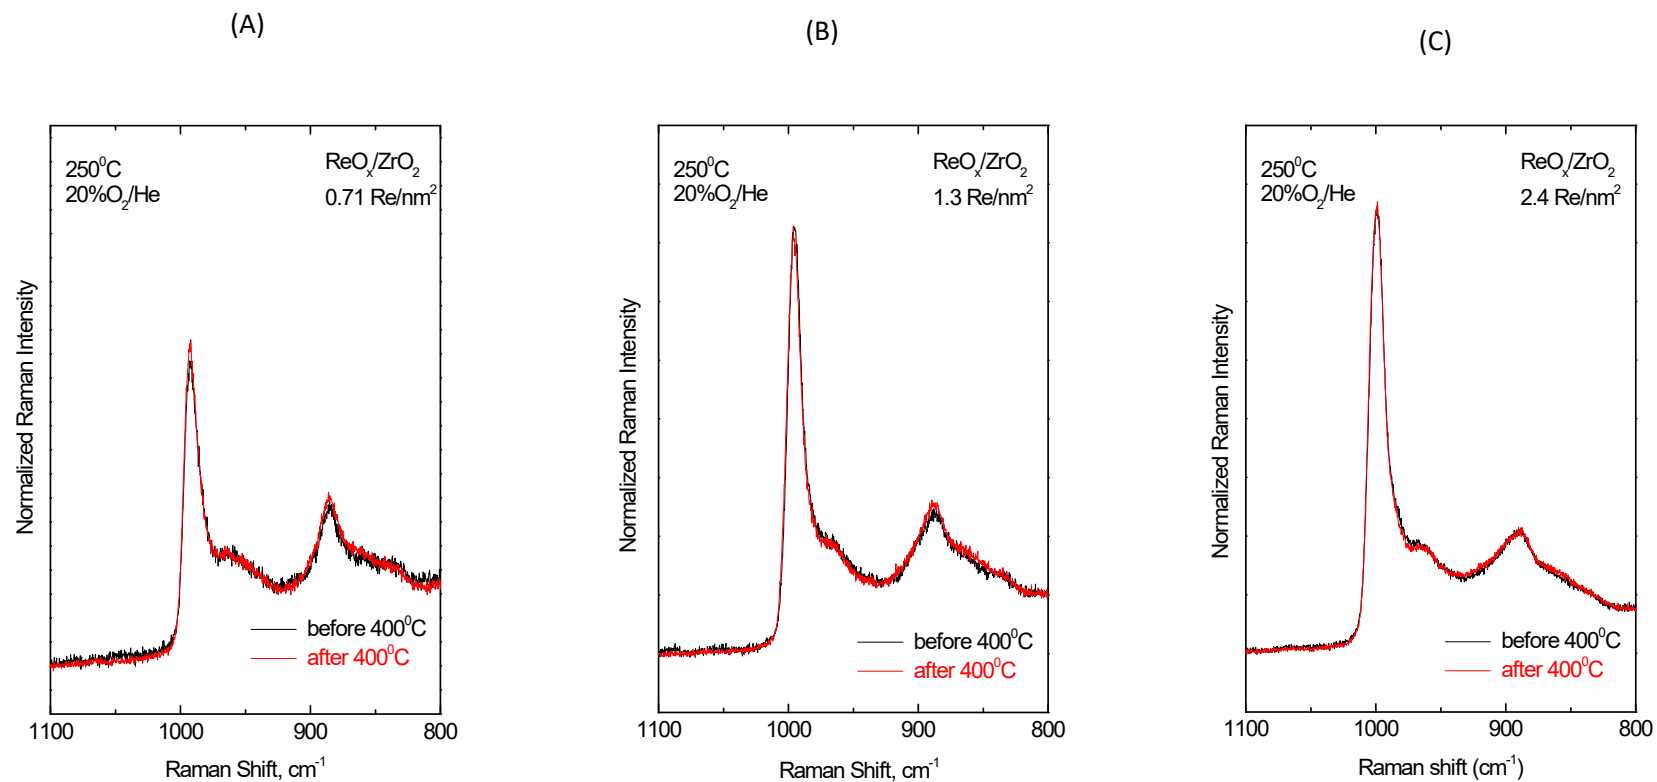

**Figure S2.** *In situ* Raman spectra obtained at 250°C under flowing 20%  $\text{O}_2/\text{He}$  for  $\text{ReO}_x/\text{ZrO}_2$  catalysts with surface densities of: (A) 0.71  $\text{Re}/\text{nm}^2$ ; (B) 1.3  $\text{Re}/\text{nm}^2$ ; and (C) 2.4  $\text{Re}/\text{nm}^2$ . The black trace is obtained before heating at 400°C and the red trace is obtained after heating at 400°C. Spectral recording parameters: see Figure 2 caption.

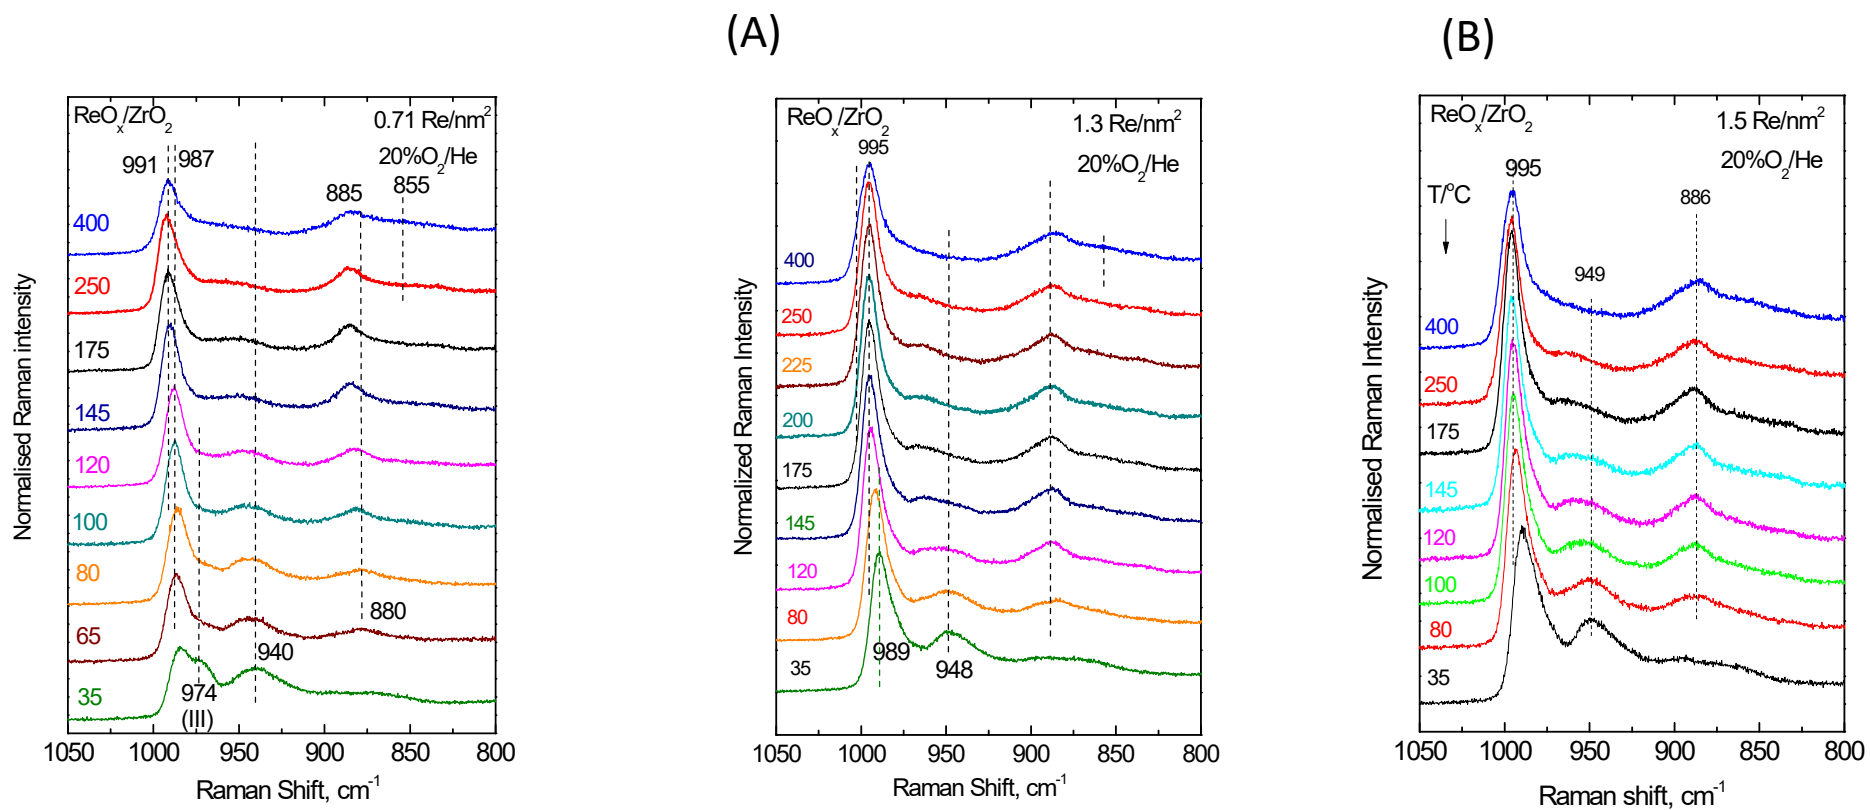

**Figure S3.** Sequential (430  $\rightarrow$  250  $\rightarrow$  175  $\rightarrow$  145  $\rightarrow$  120  $\rightarrow$  100  $\rightarrow$  80  $\rightarrow$  35 °C) *in situ* Raman spectra obtained under flowing 20%  $\text{O}_2/\text{He}$  at temperatures as indicated by each spectrum for  $\text{ReO}_x/\text{ZrO}_2$  catalysts with surface densities of : (A)  $0.71 \text{ Re/nm}^2$ ; (B)  $1.3 \text{ Re/nm}^2$ ; (C)  $1.5 \text{ Re/nm}^2$ ; (D)  $1.9 \text{ Re/nm}^2$ ; (E)  $2.4 \text{ Re/nm}^2$ ; and (F)  $3.7 \text{ Re/nm}^2$ . Spectral recording parameters: see Figure 2 caption.

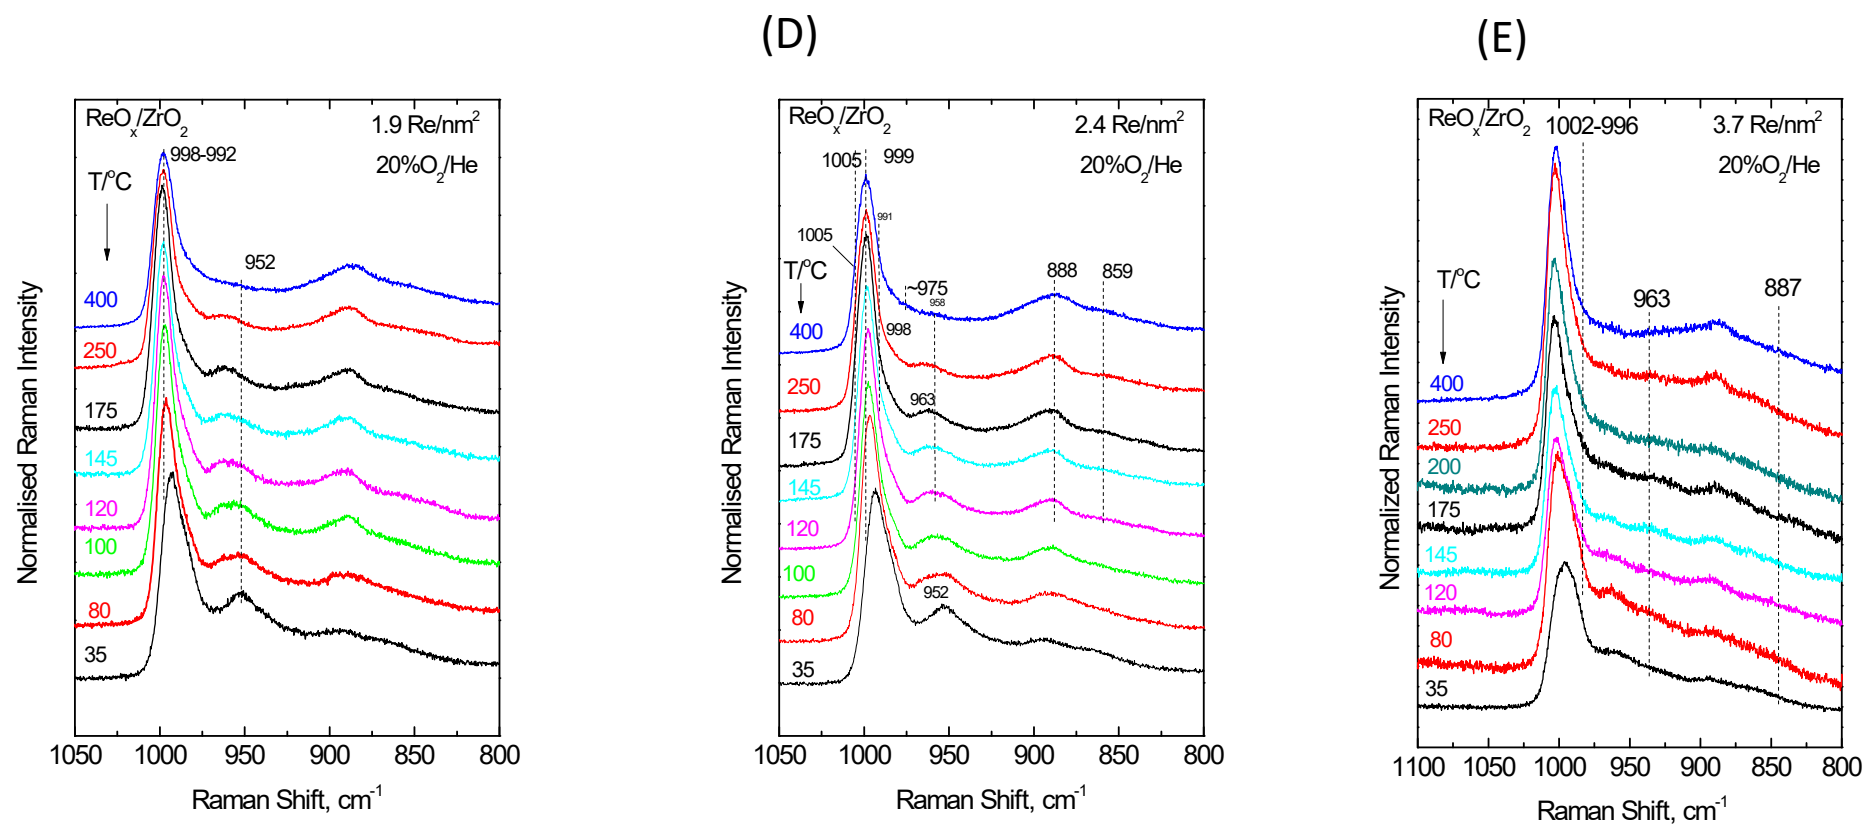

**Figure S3.** Sequential (430  $\rightarrow$  250  $\rightarrow$  175  $\rightarrow$  145  $\rightarrow$  120  $\rightarrow$  100  $\rightarrow$  80  $\rightarrow$  35 °C) *in situ* Raman spectra obtained under flowing 20%  $\text{O}_2/\text{He}$  at temperatures as indicated by each spectrum for  $\text{ReO}_x/\text{ZrO}_2$  catalysts with surface densities of : (A) 0.71  $\text{Re}/\text{nm}^2$ ; (B) 1.3  $\text{Re}/\text{nm}^2$ ; (C) 1.5  $\text{Re}/\text{nm}^2$ ; (D) 1.9  $\text{Re}/\text{nm}^2$ ; (E) 2.4  $\text{Re}/\text{nm}^2$ ; and (F) 3.7  $\text{Re}/\text{nm}^2$ . Spectral recording parameters: see Figure 2 caption.
